# Supplementary material for: Comparison of CRISPR-MAD7 and CRISPR-Cas9 for Gene Disruptions in Komagataella phaffii
Source: MDPI journal article supplement (doi:10.3390/jof10030197), 2024-03-05
Supplement: s1 [file s1]

## Supplementary File S1

# Comparison of CRISPR-MAD7 and CRISPR-Cas9 for gene disruptions in *Komagataella phaffii*

Kirill Smirnov<sup>1</sup>, Florian Weiss<sup>1</sup>, Anna-Maria Hatzl<sup>1</sup>, Lukas Rieder<sup>1</sup>, Kjeld Olesen<sup>2</sup>, Sanne Jensen<sup>2</sup>  
and Anton Glieder<sup>1</sup>

<sup>1</sup> Christian Doppler Laboratory for Innovative Pichia pastoris host and vector  
systems, Institute of Molecular Biotechnology, Graz University of Technology, Graz, Austria;

<sup>2</sup> Novo Nordisk A/S, Novo Nordisk Park, DK 2760 Måløv, Denmark

## Contents

|                                                                |    |
|----------------------------------------------------------------|----|
| S1: <i>DsRed</i> nucleotide sequence .....                     | 2  |
| S2: <i>Sh ble</i> nucleotide sequence .....                    | 2  |
| S3: sgRNA construct sequences .....                            | 2  |
| S4: CRISPR vector backbones nucleotide sequences (5'-3') ..... | 3  |
| S5: MAD7 nucleotide sequences without NLS .....                | 7  |
| S6: Primers/ssDNA Oligonucleotides .....                       | 15 |
| S7: gRNAs .....                                                | 17 |

**S1: *DsRed* nucleotide sequence (5' - 3')**

ATGGTTTCTAAGGGTGAGGAAGTTATCAAGGAGTTCATGCGTTTCAAGGTCAGAATGGAAGGT  
TCTATGAACGGTCATGAGTTCGAGATTGAAGGAGAAGGTGAAGGAAGACCATATGAGGGTACT  
CAAACCGCAAAGTTGAAGGTTACTAAAGGAGGTCCTTACCATTTCGCTTGGGATATCCTGTCTC  
CACAATTCATGTATGGTTCTAAGGCATACGTTAAGCATCCTGCAGACATTCCTGACTACAAGAA  
GTTGTCCTTTCTGAGGGTTTCAAGTGGGAAAGAGTCATGAACTTCGAAGACGGTGGATTGGTG  
ACTGTCACCTCAAGACTCTTCCCTTCAAGACGGTACTTTGATCTACAAGGTCAAGATGCGTGGTA  
CCAACCTCCACCAGATGGTCTGTATGCAGAAAAAGACTATGGGATGGGAAGCTTCTACTGA  
GAGATTGTATCCAAGAGATGGTGTGTTTGAAGGGTGAGATTCACCAAGCTTTGAAGCTTAAAGA  
TGGAGGTCACACTTGGTTGAGTTCAAGACCATTTACATGGCTAAGAAACCAGTTCAACTTCCT  
GGATACTATTACGTTGACACTAAGCTGGACATTACCTCTCACAACGAAGACTACACCATCGTTG  
AGCAATACGAGAGATCCGAAGGTAGACACCACTTGTTCTTGACGGTATGGACGAGCTTTATAA  
GTAA

**S2: *Sh ble* nucleotide sequence (5' - 3')**

ATGGCTAAACTCACCTCTGCTGTTCCAGTCCTGACTGCTCGTGATGTTGCTGGTGCTGTTGAGTT  
CTGGACTGATAGACTCGGTTTCTCCCGTGACTTCGTAGAGGACGACTTTGCCGGTGTTGTACGT  
GACGACGTTACCTGTTTCATCTCCGCAGTTCAGGACCAGGTTGTGCCAGACAACACTCTGGCAT  
GGGTATGGGTTTCGTGGTCTGGACGAAGTACGCTGAGTGGTCTGAGGTCGTGTCTACCAACTT  
CCGTGATGCATCTGGTCCAGCTATGACCGAGATCGGTGAACAGCCCTGGGGTCGTGAGTTTGCA  
CTGCGTGATCCAGCTGGTAACTGCGTGCATTTTCGTGCGAGAAGAGCAGGACTAA

**S3: sgRNA construct sequences (5' - 3')**

**With gRNA scaffold *E. coli* (CRISPR-MAD7 backbone):**

AATTCCTGATGAGTCCGTGAGGACGAAACGAGTAAGCTCGTCGGAATTTCTACTCTTGTAGAT  
GCTAGCGGCCGGCATGGTCCCAGCCTCCTCGCTGGCGCCGGCTGGGCAACATGCTTCGGCATGGC  
GAATGGGAC

**With gRNA scaffold Yeasts (CRISPR-MAD7 backbone):**

CCAGACCTGATGAGTCCGTGAGGACGAAACGAGTAAGCTCGTCGTCTGGCCCCAAATTCTAATT  
TCTACTGTTGTAGATGCTAGCGGCCGGCATGGTCCCAGCCTCCTCGCTGGCGCCGGCTGGGCAAC  
ATGCTTCGGCATGGCGAATGGGAC

**With gRNA scaffold FAQ (CRISPR-MAD7 backbone):**

TTTGACCTGATGAGTCCGTGAGGACGAAACGAGTAAGCTCGTCGTCAAAAGACCTTTTAAATTT  
CTACTCTTGTAGATGCTAGCGGCCGGCATGGTCCCAGCCTCCTCGCTGGCGCCGGCTGGGCAACA  
TGCTTCGGCATGGCGAATGGGAC

**sgRNA cassette (CRISPR-Cas9 backbone):**

AAAAAAGCTGATGAGTCCGTGAGGACGAAACGAGTAAGCTCGTCAAAAAACGAGACGACGAGTA  
GGTAGCTCAACTAGTTGTGAGGCTGACCGTCTCTGTTTTAGAGCTAGAAATAGCAAGTTAAA  
ATAAGGCTAGTCCGTTATCAACTTGAAAAAGTGGCACCGAGTCGGTGTCTTTGGCCGGCATGGT  
CCCAGCCTCCTCGCTGGCGCCGGCTGGGCAACATGCTTCGGCATGGCGAATGGGAC

Reverse complementary sequence, Hammerhead ribozyme, gRNA scaffold, a site for gRNA insertion, HDV ribozyme

#### S4: CRISPR vector backbones nucleotide sequences (5'-3')

##### CRISPR-MAD7 backbone vector:

```
AGATCCAATTCCCGCTTTGACTGCCTGAAATCTCCATCGCCTACAATGATGACATTTGGATTG
GTTGACTCATGTTGGTATTGTGAAATAGACGCAGATCGGGAACACTGAAAAATACACAGTTATT
ATTCATTTAAATGACCCTTGTGACTGACACTTTGGGAGTCCCTATTCTACTTAGTCTCATATCG
CATGAAACTTTTGATAAATTATTTTCTGATAGGAATTTTTCATCAGATATTATCATCGCGGCTT
ACGTAATAACAAAAAAATTGATGGAGTCTATACTAGGCTAACATAAACTAAGTTATTAATTA
AACAAAACAAAACGTACTAGCATTACTGTCATATATAAGGGCTCCTAACTAAACTGTAAAGAC
TTCCCGTCTCGAGTTAACCTTTTATCCGTTTGTCTCTTTGACCCTTCCTCTTCTCAAGTTTT
CTCTTGAGATAGCGCTTATTCTGGATAAAGTCGAACCAATCTTTATTGCTGATTTTGAGTTTAT
CGCGCGAAAATTTACCATCTTCTTCCAATTTTCGGTAATTTGTTTAATTTTCATATAACCCCTT
TAATGCAATACAATACGCACCATTTGCATCGGCATCCTTAGGAAGTGCATCCCCCGCTTTCGCGC
TGTCATAAAAAATGTTATTTTCGTTTCAGTACAGGTGAAATGAGACGATCGTAATCACGGTCCTC
CAGTTCAGACAAGGAGTTACGCATTTGTACGGTCAGGCGGAAGATTTCAAAGATGTGTTGCACA
ATTTTCGTAGTCAATAATATCTTGCCGCAGATCATGGCCATCGCGCCAGTTAATATCGGTCATTT
CGAGTGTTTTCTCCATATCTTTGGTGATGTCTATAGTGTGCGACTCGTTGGAGAATCGTCCGTT
CACGAATCTTCTTTTGATGCGTACGCCGTAAGTGTAACAGACCAGGAAGTCTTAGACATAACA
GTATTCTGGGTAATAAAGTTGTTGTAGTCGAATGTGAAGCAGAACAGGTTCTTCTCGGAGTCGT
AGCGGATGCTGTCAAACCTTCTTAATGAACTCTCTCTTGGCATCGACGGTCAAATCCTTGAATTT
AAAGATATTGACAAAGCCCGTTGTGGGATCGATCTTTGACGTGTAAGCAGCGGGGACGTAGAAA
ATGCAGCCGCATTGGTGACCGACGTTCTTCAGTTTGTGCGGGATATATGTGAGCTGGTATCCTT
TCAGCAGGCCGCCATTCTCCGTAATAGAAATGTCCTTGAAGACAAGATAATTGAGTTTGTTAAT
CAACATTGTCTCGAATTTCTGGTATACCTGCCTCTCGACCTTGAAGCGACCTTCTTGAAGCCGT
AACTCAAGTCCTCCATGGCTATTATCGCGTTATACTTAATCACCATTTTACTTATTTCTGTAAT
GACCAGGGACAGATAGCCTTCCTTGATTTCTTAATTTCCCGATTTCTTCCACTCCTTTCCGGG
CGATCTGCCTTGCACCTCCTGCTGTTTCAGCTTAATCTGATAGTCGTAGCCATTCACAATGTTA
AAAGATTTTTGCTCCACGATATTACCACAGGTGTGATCACGGAACGTAGATCAAGTTTCTCT
CACCCCGATCGATGCCGATCACGTGGAGGTCTTCTCTTTGGCTATATACTGCAGAATCCTGTGCG
TTGATAAATCCCGTCTTATTAGCCTTAAAGTTAATAGTAATCGGCATGTGCAGGAAATATTTGT
CATAAGTGTACCGATAGTCCCTAACAATGTTTGTGCGGCTTCGTGATGGCCGACCACATCTTT
CAATTTAGCCGCTCGTCGGAAGCTCCTTGTGCTTTTATCATTAAGTACTTATAAAGTTCC
TGATAGATATTCTCTGGTATGTTTTTCTGACAATTTGGATGTTACCAAATTTGGTCCTTCTCCT
CGGCCTCGTATGTGCGATTGACGAGGATACTTCCCTTCTTGTGAATAATAGGGTTCTTGATTGA
GCTTTTTTCGAAAGAAGATCTCGGCCTCCCCATTGAGTTTAAGCACAATGTCCTTGAGGTTTTCT
TCAGAGAAGAGATTCTTCAGGTACATGGTGTGCAGGTTATCGTTCCCGGTACTTTTCTTAGAGA
AGTCTTTGTTATAGATCTGGAAGGTAAGCTGCCCCCTCTCCTGGAGGAGGTGATGTCTTT
CTCACTGATGTATGTCCAATCAATTTTGTAGCCCTGCAGCTCCACTTCTCTGTAAAAGCCGCTAA
TATCCTCGTAAGTACTGGTATCGGAAAAATCGAAGCCGAAGTTTTTCCATTCCGGGTGAATAGC
GATGCAATTCTTAAAGTAGTCGATGAGGTCATGACAGAATGTTATATCGAAGTCTTTGGATGAC
TTAATGTGCTTGTCTGCTTGTATCCTTCCAGGATGTAGGCGCTTGGTTTGTATGTCTCTACCCC
GGTTTTTGATGAGAGGAACACCTTAGGGATCATTTTGTGTTGGACCTGGGAGCAGATTGTAGATC
ATCTTCTGTAGTCGCCTTTGTTCTCGGAGGTATTCCCCTCAATGATCTTCTGTCTGGCTTATT
```

TTTCGCATTGAAGATGCCAGGTAGTACAGATTATCGCGCATAAGGATTATGGCATTGTTGGAG  
TACTCCTTAGATTTACTCCAGCCGTCTGCGAGAGTAGGTATGCCAAAGTTCAGCTTGATCTTCT  
TAGTAGAATATGGCTTTTGTGTACGTAGTTCCCTCAGGAGATTATAGAGGGATATGACAGGGTA  
AATCTCATCGTAGATTTCTCCAGTTTCGGCATAGAAGTTGTTATCTTTATCCACCAGTTCTTCT  
GTCATGAACACAGAACACCAGTGGAAGGCATTCATGATCACATCCAACACATTCTTCAGCTCGC  
TGGCTTTCAACTCTGACTCTACCAGGTGGATCTCAGGATTATACTTCAGTTCCTGTGCCTCAAA  
ATTGTTTCAGGATGTGTGAAATCTCGTGGATGTAAGTTTCGGCTTTGATATTATCGTCTGAACAC  
AGCTTGTAGTTGCTAACCAGCTCGTTGATCTCAGTAATACTCTTCTGCAGATCATTCTTCACGG  
CCTTTTTGACCTTGTCTGCCTTGGACTTGGCATTGCCAGGCAGGATATTGTTGTAGTGGATTTT  
GAGAGCCGTGTTAATTGTCTCCCAGTCGCGATAGGTTTTCTGTGACACAGACTCGTAAACTTG  
GACACAATGTAGATTTTATCCAGGTTATAACCGTTATAATTGTCCCCGATCTTTCGAGCCGCT  
CCACAATGTGCTTAGAACTGATGTTGTCAAGAAACCCGTTAACTCTGGTACACCTCCTCGTC  
AGATTCAAATTTGTAGGGGACTTCGTAGCTGGTATCGGCGATACACAGGATCTGTTTGTGCAGC  
TTCTGCAACTTGTACAAATTTCTATTCTCTTTGTTTTTCTGGCAATACAGATTCATAAAGCTGT  
TCACCTTACCACAGATGTCGTTGTAAAAGCTTATACCCTCCTGGGTGATAAACTCGCCGATTT  
TTCATAAGAGTAGATCTCCTCCAGACTCATCTCCTTCAAGGAATCTTTCATGTCACCAGAGATT  
TTGTTAATATCATCGTTGCTCAGGGATTTTACTATTTCGCCTGTAGACGAGGGCGTTTGAAAAGA  
AAATTTTCGGCATTGTCATTCACGATCCGATGGCAACTACTGGAAGAGATATCGTCAGCTGAGAA  
GCAGTTAGCGCGGTTTTTAAAGTAGTCTTTAAAGGACGTAGCGAATCTACTAAAAAGTTTGATG  
ACCTGTGTCTTCTCCTCCTTTTCGCTGGCGCTGTAATTATTGTTATGTATCACGAACTCGGGAA  
GTATATCGCTGATGAGTTTTGCGCTAAACATGTTTTTAAATCTGTATCATTTGCAAAATTTCTT  
ATGTATGGCTTTTCTATACTCGGTCTGCTCTTTAATGAGGGTGTCTTTGTTATCGCCGTTCTTC  
AGCTGAATCTCCATTTTCTCGAAAAGGCTGGTCCAATCAATATCATCAATGGAACCTCAGGGTTT  
CGCTAATGAACCCGCGGTAGTAATCGTCCATGATATCTTTCAGAATCTGGCGGTTTTCCCTCT  
AAGCTCATCTTCTTGATTATACCGTTCTTCACAATAAATTGCTGAGTTGTCTCGGTAGGAATG  
AGAGCGTTCCGCAGGGTCTTTTGGAGTGAGCTGATCCCTATAAAGTTCTGGAAATTGTTTGTAC  
CGTTGTTTCATCGTTTCGGAATTCTGTTGTAGTTTTAATATAGTTTGAGTATGAGATGGAACCA  
GAACGAAGGAATTATCACCAGTTTATATATTCTGAGGAAAGGGTGTGTCCTAAATTGGACAGTC  
ACGATGGCAATAAACGCTCAGCCAATCAGAATGCAGGAGCCATAAATTGTTGTATTATTGCTGC  
AAGATTTATGTGGGTTCACATTCCACTGAATGGTTTTCACTGTAGAATTGGTGTCTAGTTGTT  
ATGTTTTCGAGATGTTTTCAAGAAAACTAAAATGCACAACTGACCAATAATGTGCCGTCGCGC  
TTGGTACAAACGTCAGGATTGCCACCACTTTTTTCGCACTCTGGTACAAAAGTTTCGCACTTCCC  
ACTCGTATGTAACGAAAAACAGAGCAGTCTATCCAGAACGAGACAAATTAGCGCGTACTGTCCC  
ATTCCATAAGGTATCATAGGAAACGAGAGTCTCCCCCATCACGTATATATAAACACACTGAT  
ATCCCACATCCGCTTGTACCAAATAATACATCCAGTTCAAGTTACCTAAACAAATCAAAAAT  
TCCCTGATGAGTCCGTGAGGACGAAACGAGTAAGCTCGTCGGAATTTCTACTCTTGTAGATGCT  
AGCGGCCGGCATGGTCCCAGCCTCCTCGCTGGCGCCGGCTGGGCAACATGCTTCGGCATGGCGAA  
TGGGACTCAAGAGGATGTCAGAATGCCATTTGCCTGAGAGATGCAGGCTTCATTTTTGATACTT  
TTTTATTTGTAACCTATATAGTATAGGATTTTTTTTTGTCATTTTGTTCCTTCTCGTACGAGCTT  
GCTCCTGATCAGCCTATCTCGCAGCAGATGAATATCTTGTGGTAGGGGTTTGGGAAAATCATTC  
GAGTTTGATGTTTTTCTTGGTATTTCCCACTCCTCTTCAGAGTACAGAAGATTAAGTGAGACCT  
TCGTTTGTGCGGATCCTTCAGTAATGTCTTGTCTTTTGTGTCAGTGGTGAGCCATTTTGACT  
TCGTGAAAGTTTCTTTAGAATAGTTGTTTCCAGAGGCCAAACATTCCACCCGTAGTAAAGTGCA  
AGCGTAGGAAGACCAAGACTGGCATAAATCAGGTATAAGTGTGAGCACTGGCAGGTGATCTTC  
TGAAAGTTTCTACTAGCAGATAAGATCCAGTAGTCATGCATATGGCAACAATGTACCGTGTGGA  
TCTAAGAACGCGTCCTACTAACCTTCGCATTCGTTGGTCCAGTTTGTGTTATCGATCAACGTG  
ACAAGTTGTGATTCGCGTAAGCATGCATACCAAGGACGCCTGTTGCAATTCGAAGTGAGC  
CAGTTCCAACAATCTTTGTAATATTAGAGCACTTCATTGTGTTGCGCTTGAAAGTAAAATGCGA  
ACAAATTAAGAGATAATCTCGAAACCGGACTTCAAACGCCAATATGATGTGCGGCACACAATA  
AGCGTTCATATCCGCTGGGTGACTTTCTCGCTTTAAAAAATTATCCGAAAAAATTTCTAGAGT  
GTTGTTACTTTATACTTCCGGCTCGTATAATACGACAAGGTGTAAGGAGGACTAAACCATGGCT  
AAACTCACCTCTGCTGTTCCAGTCCTGACTGCTCGTGATGTTGCTGGTGCTGTTGAGTTCTGGAC

TGATAGACTCGGTTTTCTCCCGTGAAGTTCGTAGAGGACGACTTTGCCGGTGTGTACGTGACGAC  
 GTTACCCTGTTTCATCTCCGCAGTTCAGGACCAGGTTGTGCCAGACAACACTCTGGCATGGGTAT  
 GGGTTCGTGGTCTGGACGAACTGTACGCTGAGTGGTCTGAGGTCGTGTCTACCAACTTCCGTGA  
 TGCATCTGGTCCAGCTATGACCGAGATCGGTGAACAGCCCTGGGGTCGTGAGTTTGCACCTGCGT  
 GATCCAGCTGGTAACTGCGTGCATTTTCGTGCGAGAAGAGCAGGACTAACAATTGACACCTTACG  
 ATTATTTAGAGAGTATTTATTAGTTTTATTGTATGTATACGGATGTTTTATTATCTATTTATGC  
 CCTTATATTCTGTAACATATCCAAAAGTCTATCTTATCAAGCCAGCAATCTATGTCCGCGAACG  
 TCAACTAAAAATAAGCTTTTTATGCTCTTCTCTCTTTTTTTCCCTTCGGTATAATTATACCTTGC  
 ATCCACAGATTCTCCTGCCAAATTTTGCATAATCCTTTACAACATGGCTATATGGGAGCACTTA  
 GCGCCCTCCAAAACCCATATTGCCTACGCATGTATAGGTGTTTTTTCCACAATATTTTCTCTGTG  
 CTCTCTTTTTTATTAAAGAGAAGCTCTATATCGGAGAAGCTTCTGTGGCCGTATATTTCGGCCTT  
 ATCGTGGGACCACATTGCCTGAATTGGTTTGCCCCGGAAGATTGGGGAAACTTGATCTGATTA  
 CCTTAGCTGCATCGAGATAAGCTGGGGGAACATTGCGGAAAATGAAACAAGTCGGCTGTTATAG  
 TATATTTATTATAATATTGAAAGATCTCAAAAGACTACTTATTTTTGAATGAACCAAGTATGA  
 AATCAACCTATTTGGGGTTGACCAAAAATAAGTAAATATTAATTGTCGAGGTACCACTGAGCGTC  
 AGACCCCGTAGAAAAGATCAAAGGATCTTCTTGAGATCCTTTTTTTCTGCGCGTAATCTGCTGC  
 TTGCAACAAAAAAACCACCGCTACCAGCGGTGGTTTGTGTGCGGATCAAGAGCTACCAACTC  
 TTTTTCCGAAGGTAAGTGGCTTCAGCAGAGCGCAGATACCAAATACTGTTCTTCTAGTGTAGCC  
 GTAGTTAGGCCACCACTTCAAGAACTCTGTAGCACCGCCTACATACCTCGCTCTGCTAATCCTGT  
 TACCAGTGGCTGCTGCCAGTGGCGATAAGTCGTGTCTTACCGGGTTGGACTCAAGACGATAGTT  
 ACCGGATAAGGCGCAGCGGTGCGGCTGAACGGGGGGTTCGTGCACACAGCCAGCTTGGAGCGA  
 ACGACCTACACCGAACTGAGATACCTACAGCGTGAGCTATGAGAAAGCGCCACGCTTCCCGAAG  
 GGAGAAAGGCGGACAGGTATCCGGTAAGCGGCAGGGTCGGAACAGGAGAGCGCACGAGGGAGC  
 TTCCAGGGGGAAACGCCTGGTATCTTTATAGTCCTGTGCGGGTTTCGCCACCTCTGACTTGAGCG  
 TCGATTTTTGTGATGCTCGTCAGGGGGGCGGAGCCTATGGAAAACGCCAGCAACGCGGCCTTT  
 TTACGGTTCCTGGCCTTTTGCTGGCCTTTTGCTCACATGTTCTTTCCTGCGGTACCC

# **CRISPR-Cas9 backbone vector:**

TCAAGAGGATGTCAGAATGCCATTTGCCTGAGAGATGCAGGCTTCATTTTTGATACTTTTTTAT  
 TTGTAACCTATATAGTATAGGATTTTTTTTTGTGCTATTTTGTCTTCTCGTACGAGCTTGCTCCT  
 GATCAGCCTATCTCGCAGCAGATGAATATCTTGTGGTAGGGGTTTGGGAAAATCATTCGAGTTT  
 GATGTTTTTCTTGGTATTTCCCACTCCTCTTCAGAGTACAGAAGATTAAAGTGAGACCTTCGTTT  
 GTGCGGATCCTTCAGTAATGTCTTGTCTTTTGTGTCAGTGGTGAGCCATTTTGACTTCGTGA  
 AAGTTTCTTTAGAATAGTTGTTTCCAGAGGCCAAACATTCACCCGTAGTAAAGTGCAAGCGTA  
 GGAAGACCAAGACTGGCATAAATCAGGTATAAGTGTCGAGCACTGGCAGGTGATCTTCTGAAAAG  
 TTTCTACTAGCAGATAAGATCCAGTAGTCATGCATATGGCAACAATGTACCGTGTGGATCTAAG  
 AACGCGTCTACTAACCTTCGCATTCGTTGGTCCAGTTTGTGTTATCGATCAACGTGACAAGG  
 TTGTGATTCGCGTAAGCATGCATACCAAGGACGCTGTTGCAATTCCAAGTGAGCCAGTTC  
 CAACAATCTTTGTAATATTAGAGCACTTCATTGTGTTGCGCTTGAAAGTAAAATGCGAACAAT  
 TAAGAGATAATCTCGAAACCGGACTTCAAACGCCAATATGATGTGCGGCACACAATAAGCGTT  
 CATATCCGCTGGGTGACTTTCTCGCTTTAAAAAATTATCCGAAAAAATTTTCTAGAGTGTTGTT  
 ACTTTATACTTCCGGCTCGTATAATACGACAAGGTGTAAGGAGGACTAAACCATGGCTAAACTC  
 ACCTCTGCTGTTCCAGTCCTGACTGCTCGTGATGTTGCTGGTGCTGTTGAGTTCTGGACTGATA  
 GACTCGGTTTCTCCCGTGAAGTTCGTAGAGGACGACTTTGCCGGTGTGTACGTGACGACGTTAC  
 CCTGTTTCATCTCCGCAGTTCAGGACCAGGTTGTGCCAGACAACACTCTGGCATGGGTATGGGTT  
 CGTGGTCTGGACGAACTGTACGCTGAGTGGTCTGAGGTCGTGTCTACCAACTTCCGTGATGCAT  
 CTGGTCCAGCTATGACCGAGATCGGTGAACAGCCCTGGGGTCGTGAGTTTGCACCTGCGTGATCC  
 AGCTGGTAACTGCGTGCATTTTCGTGCGAGAAGAGCAGGACTAACAATTGACACCTTACGATTAT  
 TTAGAGAGTATTTATTAGTTTTATTGTATGTATACGGATGTTTTATTATCTATTTATGCCCTTA  
 TATTCTGTAACATATCCAAAAGTCTATCTTATCAAGCCAGCAATCTATGTCCGCGAACGTCAAC  
 TAAAAATAAGCTTTTTATGCTCTTCTCTCTTTTTTTCCCTTCGGTATAATTATACCTTGCATCCA

CAGATTCTCCTGCCAAATTTTGCATAATCCTTTACAACATGGCTATATGGGAGCACTTAGCGCC  
CTCCAAAACCCATATTGCCTACGCATGTATAGGTGTTTTTCCACAATATTTTCTCTGTGCTCTC  
TTTTTATTAAAGAGAAGCTCTATATCGGAGAAGCTTCTGTGGCCGTTATATTCGGCCTTATCGT  
GGGACCACATTGCCTGAATTGGTTTTGCCCCGGAAGATTGGGGAACTTGGATCTGATTACCTTA  
GCTGCATCGAGATAAGCTGGGGGAACATTCGCGAAAAATGAAACAAGTCGGCTGTTATAGTATAT  
TTATTATAATATTGAAAGATCTCAAAAAGACTACTTATTTTTGAATGAACCAAGTATGAAATCA  
ACCTATTTGGGGTTGACCAAAAATAAGTAAATATTAATTGTCTGAGGTACCACTGAGCGTCAGACC  
CCGTAGAAAAGATCAAAGGATCTTCTTGAGATCCTTTTTTTCTGCGCGTAATCTGCTGCTTGCA  
AACAAAAAAACCACCGCTACCAGCGGTGGTTTGGTTTGTCTGGATCAAGAGCTACCAACTCTTTTT  
CCGAAGGTAACCTGGCTTCAGCAGAGCGCAGATACCAATACTGTTCTTCTAGTGTAGCCGTAGT  
TAGGCCACCACTTCAAGAACTCTGTAGCACCGCCTACATACCTCGCTCTGCTAATCCTGTTACCA  
GTGGCTGCTGCCAGTGGCGATAAGTCGTGTCTTACCGGGTTGGACTCAAGACGATAGTTACCGG  
ATAAGGCGCAGCGGTGCGGCTGAACGGGGGTTTCGTGCACACAGCCCAGCTTGGAGCGAACGAC  
CTACACCGAACTGAGATACCTACAGCGTGAGCTATGAGAAAGCGCCACGCTTCCCGAAGGGAGA  
AAGGCGGACAGGTATCCGGTAAGCGGCAGGGTCGGAACAGGAGAGCGCACGAGGGAGCTTCCAG  
GGGGAAACGCCCTGGTATCTTTATAGTCCTGTCTGGGTTTTCGCCACCTCTGACTTGAGCGTCGATT  
TTTGTGATGCTCGTCAGGGGGGCGGAGCCTATGGAAAAACGCCAGCAACGCGGCCTTTTTACGG  
TTCCTGGCCTTTTTGCTGGCCTTTTTGCTCACATGTTCTTTCCTGCGGTACCCAGATCCAATTCCCG  
CTTTGACTGCCTGAAATCTCCATCGCCTACAATGATGACATTTGGATTTGGTTGACTCATGTTG  
GTATTGTGAAATAGACGCAGATCGGGAACACTGAAAAATACACAGTTATTATTCATTTAAATG  
ACCTTTGTGACTGACACTTTGGGAGTCCCTATTCTACTTAGTCTCATATCGCATGAAACTTTTG  
ATAAATTATTTTCTGATAGGAATTTTTTCATCAGATATTATCATCGCGGCTTACGTAATAACAAA  
AAAAATTGATGGAGTCTATACTAGGCTAACATAAACTAAGTTATTAATTAACAAAACAAAAC  
GTACTAGCATTACTGTCATATATAAGGGCTCCTAACTAAAACGTAAAGACTTCCCGTCTAGAG  
TTAAACTTTTTCTTTCTTTCTTTGGGTCTCCACCGAGCTGAGAGAGGTCGATTCTTGTTTCATAG  
AGCCCCGTAATTGACTGATGAATCAGTGTGGCGTCCAGGACCTCCTTTGTAGAGGTGTACCGCT  
TTCTGTCTATGGTGGTGTGGAAGTACTTGAAGGCTGCAGGCGCGCCCAAGTTGGTCAGAGTAAA  
CAAGTGGATAATGTTTTCTGCCTGCTCCCTGATGGGCTTATCCCTGTGCTTATTGTAAGCAGAA  
AGCACCTTATCGAGGTTAGCGTCGGCGAGGATCACTCTTTTGGAGAATTCGCTTATTTGCTCGA  
TGATCTCATCAAGGTAGTGTGTTGTGTTGCCACGAACAGCTGCTTCTGCTCATTATCTTCGGG  
AGACCCTTTGAGCTTTTCATAGTGGCTGGCCAGATACAAGAAATTAACGTATTTAGAGGGCAGT  
GCCAGCTCGTTACCTTTCTGCAGCTCGCCGCACTAGCGAGCATTCTGTTCCGGCCGTTTTCAAG  
CTCAAAGAGAGAGTACTTGGGAAGCTTAATGATGAGGTCTTTTTTGACCTCTTTATATCCTTTC  
GCCTCGAGAAAGTCGATGGGGTTTTTTTTCGAAGCTTGATCGCTCCATGATTGTGATGCCCAGCA  
GTTCCCTTGACGCTTTTGAGTTTTTTAGACTTCCCTTTCTCCACTTTGGCCACAACCAGTACACTG  
TAAGCGACTGTAGGAGAAATCGAATCCGCCGTATTTCTTGGGGTCCCAATCTTTTTTGCGTGCGA  
TCAGCTTGTCTGCTGTTCCCTTTTCGGGAGGATACTTTCCTTGGAGAAGCCTCCGGTCTGTACTTCG  
GTCTTTTTTAACGATGTTACCTGCGGCATGGACAGGACCTTCCGGACTGTGCGGAAATCCCTACC  
CTTGTCACACAGATTTCTCCTGTTTCTCCGTTTGTTTCGATAAGTGGTCGCTTCCGAATCTCTC  
CATTTGGCCAGTGAATCTCGGTCTTGAAAAAATTCATAATATTGCTGTAAAAGAAGTACTTAGC  
GGTGGCCTTGCCTATTTCTGCTCAGACTTTGCGATCATTTTCTAACATCGTACACTTTATAGT  
CTCCGTAAACAAATTCAGATTCAAGCTTGGGATATTTTTTGATAAGTGCAGTGCCTACCACTGC  
ATTCAGGTAGGCATCATGCGCATGGTGGTAATTGTTGATCTCTCTCACCTTATAAACTGAAAG  
TCCTTTCTGAAATCTGAGACCAGCTTAGACTTCAGAGTAATAACTTTCACCTCTCGAATCAGTT  
TGTCATTTTTCATCGTACTTGGTGTTCATGCGTGAATCGAGAATTTGGGCCACGTGCTTGGTGAT  
CTGGCGTGTCTCAACAAGCTGCCTTTTGATGAAGCCGGCTTATCCAACCTCAGACAGGCCACCTC  
GTTACAGCCTTAGTCAGATTATCGAATTCGGTGTGTGATCAGTTTGGCGTTCAGCAGCTGCCG  
CCAATAATTTTTCATTTTCTTGACAACTTCTTCTGAGGGGACGTTATCACTCTTCCCTCTATTTT  
TATCGGATCTTGTCAACACTTTATTATCAATAGAATCATCTTTGAGAAAAGACTGGGGCACGAT  
ATGATCCACGTCGTAGTCGGAGAGCCGATTGATGTCCAGTTCCTGATCCACGTACATGTCCCTG  
CCGTTCTGCAGGTAGTACAGGTAGAGCTTCTCATTCTGAAGCTGGGTGTTTTCAACTGGGTGTT  
CCTTAAGGATTTGGGACCCCAGTTCTTTTATACCCTCTTCAATCCTCTTCATCCTTCCCTACTG

TTCTTCTGTCCCTTCTGGGTAGTTTGGTTCTCTCGGGCCATCTCGATAACGATATTCTCGGGCTT  
 ATGCCCTTCCATTACTTTGACGAGTTCATCCACGACCTTAACGGTCTGCAGTATTCCCTTTTGA  
 TAGCTGGGCTACCTGCAAGATTAGCGATGTGCTCGTGAAGACTGTCCCCCTGGCCAGAACTTG  
 TGCTTTCTGGATGTCCTCCTTAAAGGTGAGAGAGTCATCATGGATCAACTGCATGAAGTTCCGG  
 TTGGCAAATCCATCGGACTTAAGAAAATCCAGGATTGTCTTTCCACTCTGCTTGTCTCGGATCC  
 CATTGATCAGTTTTCTTGACAGCCGCCCCATCCTGTATATCGGCGCCTCTTGAGCTGTTTCATG  
 ACTTTGTCTGTCGAAGAGATGAGCGTAAGTTTTCAAGCGTTCTTCAATCATCTCCCTATCTTCAA  
 ACAACGTAAGGGTGAGGACAATGTCCTCAAGAATGTCCTCGTTCTCCTCATTTGTCCAGGAAGTC  
 CTTGTCTTTAATGATTTTCAGGAGATCGTGATACGTTCCCAGGGATGCGTTGAAGCGATCCTCC  
 ACTCCGCTGATTTCAACAGAGTCGAAACATTCAATCTTTTTGAAATAGTCTTCTTTGAGCTGTT  
 TCACGGTAACCTTCCGGTTTCGTCTTGAAGAGGAGGTCCACGATAGCTTTCTTCTGCTCTCCAGAC  
 AGGAATGCTGGCTTTCTCATCCCTTCTGTGACGTATTTGACCTTGGTGAGCTCGTTATAAACTG  
 TGAAGTACTCGTACAGCAGAGAGTGTTTAGGAAGCACCTTTTCGTTAGGCAGATTTTATCAAA  
 GTTAGTCATCCTTTCGATGAAGGACTGGGCAGAGGCCCTTATCCACGACTTCCTCGAAGTTCC  
 AGGGAGTGATGGTCTCTTCTGATTTGCGAGTCATCCACGCGAATCTGGAATTTCCCCGGGCGAG  
 GGGGCTACATAGTAGGGTATCCGAAATGTGAGGATTTTCTCAATCTTTTCCCTGTTATCTTTTC  
 AAAAAGGGGTAGAAATCCTCTTGCCGCTGAGGATAGCGTGCAGTTCGCCCAGGTGAATCTGGT  
 GGGGATGCTTCCATTGTGCGAAAGTGCGCTGTTTGCACAACAGATCTTCTCTGTTAAGCTTTAC  
 CAGCAGCTCCTCGGTGCCGTCCATTTTTTCCAAGATGGGCTTAATAAATTTGTAAAATTCCTCC  
 TGGCTTGCTCCGCCGTCAATGTATCCGGCGTAGCCATTTTTAGACTGATCGAAGAAAATTCCT  
 TGTACTTCTCAGGCAGTTGCTGTCTGACAAGGGCCTTCAGCAAAGTCAAGTCTTGGTGGTGCTC  
 ATCATAGCGCTTGATCATACTAGCGCTCAGCGGAGCTTTGGTGATCTCCGTGTTCACTCGCAGA  
 ATATCACTCAGCAGAATGGCGTCTGACAGGTTCTTTGCCGCCAAAAAAGGTCTGCGTACTGGT  
 CGCCGATCTGGGCCAGCAGATTGTGCGAGATCATCATCGTAGGTGTCTTTGCTCAGTTGAAGCTT  
 GGCATCTTCCGCCAGGTGCAAGTTAGATTTAAAGTTGGGGGTGAGCCCGAGTGACAGGGCGATA  
 AGATTACCAAACAGGCCGTCTTCTTCTCCCCAGGGAGCTGTGCGATGAGGTTTTCGAGCCGCC  
 GGGATTTGGACAGCCTAGCGCTCAGGATTGCTTTGGCGTCAACTCCGGATGCGTTGATCGGGTT  
 CTCTTCGAAAAGCTGATTGTAAGTCTGAACCAGTTGGATAAAGAGTTTGTGACATCGCTGTTG  
 TCTGGGTTTCAGGTCCCCCTCGATGAGGAAGTGTCGCCGAAATTTGATCATATGCGCCAGCGCGA  
 GATAGATCAACCGCAAGTCAGCCTTATCAGTACTGTCTACAAGCTTCTTCTCAGATGATATAT  
 GGTTGGGTACTTTTCATGGTACGCCACCTCGTCCACGATATTGCCAAAGATTGGGTGGCGCTCG  
 TGCTTTTTATCCTCCTCCACCAAAAAGGACTCCTCCAGCCTATGGAAGAAAGAGTCATCCACCTT  
 AGCCATCTCATTACTAAAGATCTCCTGCAGGTAGCAGATCCGATTCTTTCTGCGGGTATATCTG  
 CGCCGTGCTGTTCTTTTGAAGCCGCGTGGCTTCGGCCGTTTTCCCCGGAGTCGAACAGGAGGGCGCC  
 AATGAGGTTCTTCTTTATGCTGTGGCGATCGGTATTGCCCAGAACTTTGAATTTTTTGTCTCGGC  
 ACCTTGTAAGTCTGTCGTAATGACGGCCAGCCGACGCTGTTTGTGCCGATATCGAGCCCAATGGA  
 GTACTTCTTGTCCATCGTTTTCGGAATTCTGTTGTAGTTTTAATATAGTTTGAGTATGAGATGGA  
 ACTCAGAACGAAGGAATTATCACCAGTTTATATATTCTGAGGAAAGGGTGTGTCCTAAATTGGA  
 CAGTCACGATGGCAATAAACGCTCAGCCAATCAGAATGCAGGAGCCATAAATTGTTGTATTATT  
 GCTGCAAGATTTATGTGGGTTACATTCCACTGAATGGTTTTTCACTGTAGAATTGGTGTCTAG  
 TTGTTATGTTTCGAGATGTTTTCAAGAAAAACTAAAATGCACAACTGACCAATAATGTGCCGT  
 CGCGCTTGGTACAAACGTCAGGATTGCCACCACTTTTTTTCGCACTCTGGTACAAAAGTTTCGCAC  
 TTCCCACTCGTATGTAACGAAAAACAGAGCAGTCTATCCAGAACGAGACAAATTAGCGCGTACT  
 GTCCCAATTCATAAGGTATCATAGGAAACGAGAGTCCTCCCCCATCACGTATATATAAACACA  
 CTGATATCCACATCCGCTTGTACCAAATAATACATCCAGTTCAAGTTACCTAAACAAATCA  
 AAaaaaaaCTGATGAGTCCGTGAGGACGAAACGAGTAAGCTCGTCAAAAAACGAGACGACGAGTA  
 GGTAGCTCAACTAGTTGTGAGGTCTGACCGTCTCTGTTTTAGAGCTAGAAATAGCAAGTTAAA  
 ATAAGGCTAGTCCGTTATCAACTTGAAAAAGTGGCACCGAGTCGGTGCTTTTGGCCGGCATGGT  
 CCCAGCCTCCTCGCTGGCGCCGGCTGGGCAACATGCTTCGGCATGGCGAATGGGAC

**S5: *MAD7* nucleotide sequences (5' - 3') without NLS:**

## PpMAD7:

ATGAACAACGGAACTAACAACCTTTCAAAACTTTATTGGAATTTCTTCTTTGCAAAAGACTCTTA  
GAAACGCTTTAATCCCAACCGAAACCAACCCAGCAATTTATCGTTAAGAACGGTATCATCAAGGA  
GGACGAGCTGAGAGGTGAAAACAGACAAATCCTGAAGGACATCATGGACGACTACTACAGAGG  
ATTCATTTCCGAGACTTTGTCTTCCATCGATGACATTGACTGGACTTCACTGTTTCGAGAAAATG  
GAAATCCAATTGAAGAACGGTGACAACAAGGATACTTTGATTAAAGGAACAGACCGAATACAGA  
AAGGCTATCCATAAGAAATTTGCTAACGACGATAGATTCAAGAATATGTTCTCCGCTAAGTTGA  
TCTCTGACATTTTGCCAGAGTTTGTGATTCAACAACAATTAATCTGCTTCTGAGAAGGAAGA  
GAAGACCCAAGTCATCAAATTTGTTCTCACGTTTTGCAACTTCTTTAAGGACTACTTTAAAAAC  
AGAGCCAACCTGTTTTCTGCTGATGATATTTTCATCTTCTCTGTGCACAGAATCGTGAACGATA  
ACGCCGAAATCTTCTTCTCCAATGCTTTGGTCTACCGTAGAATCGTCAAATCTTTGTCTAACGA  
TGATATCAATAAAATCTCCGGAGACATGAAGGATTCTTTGAAAGAGATGTCTTGGAGGAGATC  
TACTCCTATGAGAAGTATGGTGAATTCATTACTCAAGAGGGTATCTCTTTCTACAACGACATCT  
GTGGTAAGGTTAATTCATTCATGAATTTGTACTGCCAAAAGAACAAGGAGAACAAGAACCTTT  
ATAAGCTTCAAAAGTTGCACAAGCAAATCTTATGTATCGCCGACACTTCTTATGAGGTTCCATA  
TAAGTTTGAGTCCGACGAGGAGGTCTACCAGTCCGTCAACGGTTTTCTGGACAACATCTCTTCT  
AAGCATATTGTTGAAAGACTTAGAAAAATTGGAGATAACTATAACGGATACAACCTTGGACAAG  
ATTTACATTGTCTCTAAGTTCTACGAATCTGTTTCTCAGAAGACTTACAGAGACTGGGAAACTA  
TTAATACCGCTTTGGAGATCCACTACAACAACATCCTTCCAGGTAACGGTAAGTCTAAGGCCGA  
CAAGGTTAAGAAAGCCGTTAAGAACGACTTACAAAAATCCATCACTGAGATTAATGAGTTGGT  
GTCTAACTATAAGTTGTGCTCTGATGACAACATCAAAGCTGAGACTTACATTCACGAAATTTCT  
CACATCTTAAACAACCTTCGAGGCCAAGAGTTGAAGTACAACCCAGAGATCCACCTTGTGAAAT  
CCGAACCTTAAAGCCTCCGAGCTGAAGAACGTCTTGGACGTTATTATGAACGCTTTTCACTGGTG  
TTCCGTGTTTCATGACTGAAGAGCTTGTGGACAAGGATAATAACTTTTACGCAGAACTGGAGGAA  
ATCTACGACGAGATTTACCTGTATTTTCTGTACAATCTTGTTAGAAACTACGTCAACCCAAA  
AGCCTTACTCTACCAAGAAAATCAAGCTTAACCTTTGGAATCCCTACTCTTGCCGACGGTTGGTC  
CAAATCTAAGGAATACTCCAATAATGCTATCATTTTAATGAGAGATAACTTGTATTACTTGGGT  
ATTTTCAACGCTAAGAACAAGCCTGACAAGAAGATTATTGAAGGTAACACCTCCGAGAACAAGG  
GAGATTACAAGAAGATGATCTACAACCTGCTTCTGGTCTTAACAAGATGATTCCAAAGGTCTT  
CTTATCCTCTAAGACTGGAGTTGAGACTTACAAGCCATCTGCTTATATCCTGGAGGGTTACAAG  
CAAAACAACACATCAAGTCTTCCAAGGATTTTGACATTACCTTTTGTACGATCTGATCGACT  
ACTTCAAGAACTGTATCGCCATCCACCCAGAGTGGAAGAACTTCGGTTTCGACTTCTCTGACAC  
TTCCACTTACGAGGATATTTCCGGTTTCTATAGAGAGGTGGAATTGCAAGGATACAAAATTGAC  
TGGACCTACATCTCCGAAAAGGACATTGACCTTTTGCAAGAAAAAGGTCAATTGTACCTGTTCC  
AAATTTACAACAAGGACTTTTCTAAGAAATCTACCGGTAACGATAACTTACATACCATGTACTT  
GAAAAACCTTTTCTCTGAGGAAAACCTTGAAGGACATCGTGTTGAAGTTGAACGGTGAGGCAGA  
AATCTTCTTTTCGTAAGTCTTCTATCAAGAACCCTATTATTCAACAAGAAAGGATCAATCTTGGTT  
AACAGAACCTACGAAGCCGAAGAGAAAAGACCAATTCGGAAACATTCAAATTGTCAGAAAGAAC  
ATTCTGAAAACATTTATCAAGAGTTGTACAAGTACTTCAATGACAAGTCCGACAAGGAGTTGT  
CTGATGAAGCTGCCAAGCTTAAGAACGTGGTGGGTCAACACGAAGCTGCTACCAACATTGTTAA  
GGACTACAGATACACCTACGACAAGTACTTTTTGCACATGCCAATTACCATTAACCTCAAGGCC  
AACAAGACCGGATTCATCAATGATAGAATTTTGCAATACATTGCCAAGGAGAAGGACTTGCACG  
TGATTGGTATCGATAGAGGTGAGAGAACTTGATTTACGTGTCAGTTATTGATACTTGGCGTAA  
CATTGTGCAACAAAAGTCTTTTAACATCGTCAACGGTTATGACTACCAAATCAAGCTGAAGCAA  
CAGGAGGGAGCTAGACAGATTGCAAGAAAGGAATGGAAGGAGATTGGTAAGATCAAAGAGATC  
AAAGAGGGTTACCTTTTCAATGGTTATTCATGAGATTTCTAAGATGGTGATTAAGTACAATGCTA  
TCATCGCTATGGAGGACCTGTCTTACGGTTTCAAGAAAGGAAGATTCAAGGTCGAGAGACAAGT  
TTACCAAAAAATTTGAAACCATGTTGATTAACAAGCTGAACTACTTAGTTTTTAAAGACATTTCT  
ATCACCGAGAATGGTGGTCTTTTGAAGGGTTACCAATTGACCTACATTCCTGACAAGTTGAAGA  
ACGTCCGTACCAATGCGGTTGTATTTTCTATGTTTCTGCGCTTACACCTCCAAGATTGACCCA  
ACTACCGGTTTTCGTCAATATCTTCAAGTTCAAGGACCTTACTGTGACGCTAAAAGAGAATTCA



TTAAGAAGTTCGACTCTATTAGATACGACTCAGAAAAGAATTTATTCTGTTTCACTTTTCGATTA  
CAACAACCTTTATCACTCAGAACACTGTTATGTCTAAGTCCTCTTGGTCAGTTTACACTTACGGT  
GTGCGTATTAAGAGAAGATTTCGTTAATGGTAGATTCTCTAACGAATCTGACACTATTGATATTA  
CCAAGGACATGGAGAAGACTTTAGAGATGACCGACATTAAGTGGAGAGACGGTCACGATTTGAG  
ACAAGATATTATTGATTACGAGATCGTGCAACACATTTTCGAAATCTTCAGATTGACTGTTCAA  
ATGAGAAACTCCTTGTCTGAATTGGAAGATCGTGATTATGACAGACTTATTTCTCCAGTTTTAA  
ATGAAAACAACATTTTCTATGATTCCGCTAAAGCTGGTGACGCATTGCCTAAAGACGCTGATGC  
TAACGGTGCATACTGTATCGCTCTGAAAGGTTTGTACGAAATCAAGCAAATTACCGAGAAGTGG  
AAGGAGGACGGTAAGTTCTCAAGAGACAAGTTAAAGATTTCAAACAAAGATTGTTTGTATTTC  
ATTCAAAACAAAAGATACTTGTAA

#### **EcMAD7:**

ATGAACAACGGCACAAATAATTTTCAGAACTTCATCGGGATCTCAAGTTTGCAGAAAACGCTGC  
GCAATGCTCTGATCCCCACGGAACACGCAACAGTTTCATCGTCAAGAACGGAATAATTAAAGA  
AGATGAGTTACGTGGCGAGAACCGCCAGATTCTGAAAGATATCATGGATGACTACTACCGCGGA  
TTCATCTCTGAGACTCTGAGTTCTATTGATGACATAGATTGGACTAGCCTGTTGAAAAAATGG  
AAATTCAGCTGAAAAATGGTGATAATAAAGATACCTTAATTAAGGAACAGACAGAGTATCGGA  
AAGCAATCCATAAAAAATTTGCGAACGACGATCGGTTTAAGAACATGTTTAGCGCCAAACTGAT  
TAGTGACATATTACCTGAATTTGTTCATCCACAACAATAATTATTCGGCATCAGAGAAAAGAGGAA  
AAAACCCAGGTGATAAAATTTGTTTTCGCGCTTTGCGACTAGCTTTAAAGATTACTTCAAGAACC  
GTGCAAATTTGCTTTTTCAGCGGACGATATTTTCATCAAGCAGCTGCCATCGCATCGTCAACGACAA  
TGCAGAGATATTTCTTTTCAAATGCGCTGGTCTACCGCCGGATCGTAAAAATCGCTGAGCAATGAC  
GATATCAACAAAATTTTCGGGCGATATGAAAGATTCATTAAAAGAAATGAGTCTGGAAGAAATA  
TATTCTTACGAGAAGTATGGGGAATTTATTACCGAGGAAGGCATTAGCTTCTATAATGATATCT  
GTGGGAAAGTGAATTTCTTTTATGAACCTGTATTGTTCAGAAAAATAAAGAAAAACAAAATTTAT  
ACAACTTCAGAACTTCACAAACAGATTCTATGCATTGCGGACACTAGCTATGAGGTCCCGTA  
TAAATTTGAAAGTGACGAGGAAGTGTACCAATCAGTTAACGGCTTCCTTGATAACATTAGCAGC  
AAACATATAGTCGAAAGATTACGCAAAATCGGCGATAACTATAACGGCTACAACCTGGATAAA  
ATTTATATCGTGTCCAAATTTTACGAGAGCGTTAGCCAAAAAACCTACCGCGACTGGGAAACAA  
TTAATACCGCCCTCGAAATTCATTACAATAATATCTTGCCGGGTAACGGTAAAGTAAAGCCGA  
CAAAGTAAAAAAGCGGTAAAGAATGATTTACAGAAATCCATCACCGAAATAAATGAAGTAGT  
GTCAAACCTATAAGCTGTGCAGTGACGACAACATCAAAGCGGAGACTTATATACATGAGATTAGC  
CATATCTTGAATAACTTTGAAGCACAGGAATTGAAATACAATCCGGAAATTCACCTAGTTGAAT  
CCGAGCTCAAAGCGAGTGAGCTTAAAAACGTGCTGGACGTGATCATGAATGCGTTTCATTGGTG  
TTCGGTTTTTATGACTGAGGAACTTGTTGATAAAGACAACAATTTTATGCGGAACTGGAGGAG  
ATTTACGATGAAATTTATCCAGTAATTAGTCTGTACAACCTGGTTCGTAACCTACGTTACCCAGA  
AACCGTACAGCACGAAAAAGATTAAATTGAACCTTTGGAATACCGACGTTAGCAGACGGTTGGTC  
AAAGTCCAAAGAGTATTCTAATAACGCTATCATACTGATGCGCGACAATCTGTATTATCTGGGC  
ATCTTTAATGCGAAGAATAAACCGGACAAGAAGATTATCGAGGGTAATACGTCAGAAAATAAG  
GGTGACTACAAAAAGATGATTTATAATTTGCTCCCGGGTCCCAACAAAATGATCCCGAAAGTTT  
TCTTGAGCAGCAAGACGGGGGTGGAACGTATAAACCGAGCGCCTATATCCTAGAGGGGTATAA  
ACAGAATAAACATATCAAGTCTTCAAAAGACTTTGATATCACTTTCTGTTCATGATCTGATCGAC  
TACTTCAAAAACCTGTATTGCAATTCATCCCGAGTGGA AAAA ACTTCGGTTTTGATTTTAGCGACA  
CCAGTACTTATGAAGACATTTCCGGGTTTTATCGTGAGGTAGAGTTACAAGGTTACAAGATTGA  
TTGGACATACATTAGCGAAAAAGACATTGATCTGCTGCAGGAAAAAGGTCAACTGTATCTGTTTC  
CAGATATATAACAAAGATTTTTCGAAAAAATCAACCGGGAATGACAACCTTCACACCATGTACC  
TGAAAAATCTTTTCTCAGAAGAAAATCTTAAGGATATCGTCCTGAAACTTAACGGCGAAGCGGA  
AATCTTCTTCAGGAAGAGCAGCATAAAGAACCCAATCATTCAAAAAAGGCTCGATTTTAGTC  
AACCGTACCTACGAAGCAGAAGAAAAAGACCAGTTTGGCAACATTCAAATTGTGCGTAAAAAT  
ATTCGGGAAAACATTTATCAGGAGCTGTACAAATACTTCAACGATAAAAGCGACAAAGAGCTGT  
CTGATGAAGCAGCCAACTGAAGAATGTAGTGGGACACCACGAGGCAGCGACGAATATAGTCAA

GGACTATCGCTACACGTATGATAAATACTTCCTTCATATGCCTATTACGATCAATTTCAAAGCC  
AATAAACCGGTTTTTATTAATGATAGGATCTTACAGTATATCGCTAAAGAAAAAGACTTACAT  
GTGATCGGCATTGATCGGGGCGAGCGTAACCTGATCTACGTGTCCGTGATTGATACTTGTGGTA  
ATATAGTTGAACAGAAAAAGCTTTAACATTGTAAACGGCTACGACTATCAGATAAACTGAAAC  
AACAGGAGGGCGCTAGACAGATTGCGCGGAAAGAATGGAAAGAAATTGGTAAAATTAAAGAGA  
TCAAAGAGGGCTACCTGAGCTTAGTAATCCACGAGATCTCTAAAATGGTAATCAAATACAATGC  
AATTATAGCGATGGAGGATTTGTCTTATGGTTTTAAAAAAGGGCGCTTTAAGGTCCAACGGCA  
AGTTTACCAGAAATTTGAAACCATGCTCATCAATAAACTCAACTATCTGGTATTTAAAGATATT  
TCGATTACCGAGAATGGCGGTCTCCTGAAAGGTTATCAGCTGACATACATTCCTGATAAACTTA  
AAAACGTGGGTCACTAGTGCGGCTGCATTTTTTATGTGCCTGCTGCATACACGAGCAAAATTGA  
TCCGACCACCGCTTTGTGAATATCTTTAAATTTAAAGACCTGACAGTGGACGCAAAACGTGAA  
TTCATTAATAAAATTTGACTCAATTCGTTATGACAGTGAATAAAATCTGTTCTGCTTTACATTTG  
ACTACAATAACTTTATTACGCAAAACACGGTCATGAGCAAATCATCGTGGAGTGTGTATACATA  
CGGCGTGCGCATCAAACGTGCTTTGTGAACGGCCGCTTCTCAAACGAAAGTGATACCATTGAC  
ATAACCAAAGATATGGAGAAAACGTTGGAAATGACGGACATTAAGTGGCGCGATGGCCACGATC  
TTCGTCAAGACATTATAGATTATGAAATTGTTTACGACATATTCGAAATTTTCCGTTTAAACAGT  
GCAAATGCGTAACTCCTTGTCTGAACTGGAGGACCGTGATTACGATCGTCTCATTTTACCTGTA  
CTGAACGAAAATAACATTTTTTATGACAGCGCGAAAGCGGGGGATGCACTTCCTAAGGATGCCG  
ATGCAAATGGTGCGTATTGTATTGCATTAAGGGTTATATGAAATTAACAAATTACCGAAA  
ATTGGAAGAAGATGGTAAATTTTCGCGCGATAAACTCAAATCAGCAATAAAGATTGGTTCG  
ACTTTATCCAGAATAAGCGCTATCTCTAA

#### **HsMAD7 1:**

ATGAACAACGGTACAAACAATTTCCAGAACTTTATAGGGATCAGCTCACTCCAAAAGACCCTGC  
GGAACGCTCTCATTCCTACCGAGACAACCTCAGCAATTTATTGTGAAGAACGGTATAATCAAGGA  
AGATGAGCTTAGAGGGGAAAACCGCCAGATTCTGAAAGATATCATGGACGATTACTACCGCGGG  
TTCATTAGCGAAACCCTGAGTTCCATTGATGATATTGATTGGACCAGCCTTTTCGAGAAAATGG  
AGATTACGCTGAAGAACGGCGATAACAAAGACACCCTCATTAAGAGCAGACCGAGTATAGAA  
AAGCCATACATAAGAAATTTGCAAATGATGACAGATTTAAAAACATGTTTACGCGCAAACTCA  
TCAGCGATATACTTCCCGAGTTCGTGATACATAACAATAATTACAGCGCCAGCGAAAAGGAGGA  
GAAGACACAGGTCATCAAACTTTTAGTAGATTTCGCTACGTCCTTTAAAGACTACTTTAAAAAC  
CGCGCTAACTGCTTCTCAGCTGACGATATCTCTCCAGTAGTTGCCATCGGATCGTGAATGACA  
ATGCCGAAATTTCTTTTCAAACGCCCTCGTCTACAGGCGAATAGTAAAATCCCTGAGCAACGA  
TGATATTAAACAAAATCTCTGGTGACATGAAAGATTCCTTGAAGGAGATGAGTCTGGAGGAGAT  
CTACTCTTATGAAAAATACGGCGAGTTTATCACCCAGGAGGGTATAAGCTTTTACAACGACATC  
TGTGGTAAGGTGAACAGCTTTATGAATCTGTATTGCCAGAAAAACAAAGAGAATAAGAATTTG  
TACAAGTTGCAGAAGCTGCACAAACAGATCCTGTGTATCGCCGATACCAGCTACGAAGTCCCT  
ACAAATTTGAATCTGACGAGGAGGTGTACCAGAGTGTTAACGGGTTTCTTGACAACATCAGTTC  
TAAGCACATTGTGGAGCGGCTGCGAAAGATCGGGGACAATTATAACGGTTATAACCTGGATAAA  
ATCTACATTGTGTCCAAGTTTTACGAGTCTGTGTCACAGAAAACCTATCGCGACTGGGAGACAA  
TTAACACGGCTCTCGAAATCCACTACAACAATATCCTGCCTGGCAATGGCAAGTCCAAGGCAGA  
CAAGGTCAAAAAGGCCGTGAAGAATGATCTGCAGAAGAGTATTACTGAGATCAACGAGCTGGT  
TAGCAACTACAAGCTGTGTTTACAGACGATAATATCAAAGCCGAACTTACATCCACGAGATTTCA  
CACATCCTGAACAATTTTGAGGCACAGGAAGTGAAGTATAATCCTGAGATCCACCTGGTAGAGT  
CAGAGTTGAAAGCCAGCGAGCTGAAGAATGTGTTGGATGTGATCATGAATGCCTTCCACTGGTG  
TTCTGTGTTTCATGACAGAAGAACTGGTGGATAAAGATAACAACTTCTATGCCGAACTGGAGGAA  
ATCTACGATGAGATTTACCCTGTCATATCCCTCTATAATCTCGTGAGGAACTACGTGACACAAA  
AGCCATATTCTACTAAGAAGATCAAGCTGAACCTTTGGCATACTACTCTCGCAGACGGCTGGAG  
TAAATCTAAGGAGTACTCCAACAATGCCATAATCCTTATGCGCGATAATCTGTACTACCTGGGC  
ATCTTCAATGCGAAAAATAAGCCAGACAAGAAGATCATTTAGGGGAATACCTCCGAGAACAAA

GGCGACTACAAGAAGATGATCTACAATCTGCTCCCAGGTCCAAACAAAATGATCCCTAAGGTGT  
TCCTCTCATCAAAAACCGGGGTAGAGACATACAAACCAAGCGCCTACATCCTGGAAGGATACAA  
GCAGAACAAGCACATTAAAGTCATCCAAAGACTTCGATATAACATTCTGTTCATGACCTCATCGAC  
TACTTTAAGAATTGCATCGCTATTACCCCCGAATGGAAAACTTCGGCTTCGATTTTTCCGATA  
CCAGTACTTACGAGGATATTAGCGGCTTTTACAGAGAAGTGGAGCTGCAGGGCTACAAAATTGA  
TTGGACATACATCAGTGAGAAAGACATCGACCTCCTCCAGGAGAAGGGGCAGCTTTACCTTTTC  
CAGATCTATAACAAAGACTTCTCTAAGAAAAGTACCGGGAACGATAACCTGCACACCATGTACC  
TGAAGAATCTCTTCTCTGAAGAAAACCTCAAGGACATTGTGCTTAAACTCAATGGGGAGGCCGA  
GATCTTCTTTTCGAAAAAGCTCAATCAAGAACCCTATTATTACACAAGAAGGGAAGTATCCTCGTC  
AATCGCACATACGAGGCCGAGGAGAAGGACCAATTTGGTAACATCCAAATTGTCAGGAAAAACA  
TACCAGAGAATATCTATCAGGAACCTTTATAAGTACTTTAATGATAAAAGCGACAAGGAGCTTTC  
CGACGAGGCGGCTAAATTGAAGAATGTGGTCGGCCATCACGAAGCCGCAACAAACATTGTTAAG  
GACTATCGGTACACTTATGACAAATATTTCTGCACATGCCGATTACTATTAACCTTTAAGGCTA  
ATAAGACGGGATTTATCAACGACAGGATTCTGCAGTATATAGCCAAAGAGAAAGACCTCCACGT  
GATCGGCATCGATCGGGGTGAGAGAACTTGATCTACGTTTTCCGTGATCGACACCTGTGGTAAT  
ATCGTGGAGCAAAAATCTTTTAACATTGTGAATGGCTACGACTATCAGATTAAGCTGAAACAGC  
AGGAGGGTGCAAGGCAGATCGCCCGAAAGGAGTGGAAGGAAATCGGGAAAATTAAGGAAATCA  
AGGAAGGCTATCTGTCCCTGGTCATTACGAAATAAGTAAAATGGTGATTAAGTATAACGCGAT  
AATAGCCATGGAGGACTTGAGTTACGGCTTCAAGAAAGGTCGCTTCAAGGTCGAGAGGCAGGTA  
TACCAGAAATTCGAGACAATGTTGATTAACAAACTCAATTATCTTGTCTTCAAGGACATTTCTA  
TTACGGAGAATGGCGGCCTGCTGAAAGGATACCAGCTCACATATATCCCCGACAAACTGAAGAA  
CGTCGGTCACCAATGCGGCTGCATTTTCTACGTCCCCGCTGCTTACACGTCAAAGATCGATCCCA  
CAACGGGCTTTGTCAATATCTTTAAATTCAAGGATTTGACCGTCGATGCCAAGAGAGAGTTTCAT  
TAAGAAGTTTGACAGCATCCGCTACGACTCCGAGAAGAACCTGTTCTGCTTCACATTTCGACTAC  
ACAACCTTTATTACCCAGAATACTGTTATGTCTAAGAGTTCCTGGTCTGTTTACACTTACGGCG  
TACGCATCAAAAGAAGATTCGTGAACGGACGATTCTCCAACGAGTCCGACACTATAGACATCAC  
CAAAGATATGGAGAAAACACTCGAAATGACCGATATTAAGTGGCGCGATGGCCATGATCTGCGG  
CAAGATATTATTGACTACGAAATTGTGCAACACATCTTTGAAATCTTCCGCCTGACCGTACAAA  
TGCGTAACTCCTTGTCTGAACTGGAGGACCGTGATTACGATCGTCTCATTTTACCTGTACTGAA  
CGAAAATAACATTTTTTTATGACAGCGCGAAAGCGGGGGATGCACTTCCTAAGGATGCCGATGCA  
AATGGTGCGTATTGTATTGCATTAAGGTTTATATGAAATTAACAAATTACCGAAAATTGG  
AAAGAAGATGGTAAATTTTCGCGCGATAAACTCAAAATCAGCAATAAAGATTGGTTCGACTTT  
ATCCAGAATAAGCGCTATCTCTAA

## HsMAD7 2:

ATGAATAACGGAACTAACAACCTTTCAGAACTTCATTGGTATATCTTCTCTCCAGAAGACCTTGC  
GAAACGCCCTGATACCCACAGAGACTACGCAGCAATTCATCGTCAAGAACGGCATTATTAAGGA  
AGATGAACTTAGGGGTGAGAACCGCCAGATCCTGAAGGACATAATGGATGACTACTACAGAGGC  
TTCATATCTGAAACATTGAGCAGCATCGATGACATAGACTGGACCTCTCTTTTCGAGAAGATGG  
AGATCCAGCTGAAGAACGGCGATAATAAGGATACACTGATTAAGGAACAAACGGAGTATAGGA  
AAGCAATACACAAGAAGTTTGCTAATGACGACCGCTTCAAGAACATGTTTTCTGCGAAACTGAT  
CAGCGACATACTGCCAGAGTTTCGTCAATTCATAACAACAATTATAGCGCTTCCGAGAAGGAGGAG  
AAAACACAAGTCATTAAATTTGTTCTCTCGCTTCGCAACATCATTTAAGGACTATTTCAAGAACA  
GAGCTAACTGCTTCAGCGCCGATGATATTTCTCAAGCAGCTGTCATAGGATCGTGAACGATAA  
TGCCGAGATCTTCTTCTCTAATGCTCTGGTGTACAGGAGAATCGTAAAGTCATTGAGCAACGAC  
GACATCAATAAGATAAGCGGTGATATGAAAGACTCTCTCAAGGAGATGAGCCTCGAGGAGATCT  
ATTCTATGAAAAATATGGAGAGTTTATCACCCAGGAAGGCATTTCTTTTACAATGACATATG  
CGGCAAGGTCAATTCATTCATGAATCTCTACTGTCAAAAGAACAAGAGAACAAAGATTTGTAC  
AACTCCAAAAGTTGCACAAGCAGATTTTGTGCATTGCAGATACCTCCTACGAGGTTCCCTACA  
AGTTCGAGAGCGATGAGGAGGTGTATCAGTCTGTGAACGGGTTTCTTGACAATATCTCTTCTAA  
GCACATCGTGGAGCGCCTCCGGAAAATAGGCGATAATTACAACGGTTATAATCTTGACAAAATT

TACATTGTATCCAAGTTCTATGAATCTGTGTCTCAGAAGACTTACAGAGACTGGGAGACGATAA  
ATACCGCTCTCGAGATCCACTACAATAACATCTTGCCAGGGAACGGAAAAGAGCAAGGCTGATAA  
AGTAAAGAAGGCTGTGAAAAATGATCTGCAGAAGTCTATTACGGAAATCAATGAGCTGGTTAG  
TAACTATAAGCTGTGCAGTGACGACAACATTAAAGCTGAAACCTACATCCATGAGATAAGCCAC  
ATTCTGAACAATTTTCGAGGCTCAAGAGCTCAAGTACAATCCAGAGATTCACCTGGTCGAGTCTG  
AATTGAAGGCAAGCGAGCTGAAGAATGTGCTCGACGTAATAATGAACGCATTCCATTGGTGCAG  
TGTGTTTCATGACCGAGGAGCTTGTGGACAAGGATAACAACCTTCTACGCCGAACCTCGAGGAAATC  
TACGACGAGATTTACCCCGTGATTAGTTTGTATAACCTGGTCCGCAACTACGTCACACAAAAAC  
CATATAGTACTAAGAAAAATCAAGCTGAATTTTCGGCATCCCGACACTTGCGGACGGATGGAGCAA  
AAGTAAGGAGTACAGCAATAACGCCATCATCCTCATGCGAGACAACCTGTATTACCTTGGAATC  
TTCAACGCTAAGAACAAGCCAGACAAGAAAATCATCGAGGGAAACACCAGCGAAAATAAAGGA  
GATTACAAGAAAATGATCTACAATCTCTTGCCCTGGACCCAATAAAATGATCCAAAAGTATTCC  
TCTCCAGCAAGACAGGCGTGGAGACTTACAAGCCGAGTGCATATATCCTCGAGGGGTATAAACA  
GAACAAGCACATCAAGTCTAGCAAAGATTTTCGATATCACTTTTTGTGCATGATCTCATCGACTAT  
TTTAAGAACTGTATCGCCATTCATCCCGAGTGGAGAATTTTCGGCTTTGACTTCAGCGATACGA  
GCACGTATGAAGATATTAGTGGATTTTATAGAGAGGTGGAACCTTCAGGGGTATAAAATCGACT  
GGACTTACATCAGTGAAAAGGATATTGATCTGCTGCAGGAGAAGGGGCAACTCTATCTCTTCCA  
AATCTATAACAAGGATTTTTCGAAGAAGTCCACCGGGAATGATAATCTCCATACTATGTATCTC  
AAGAACCTGTTACGCGAAGAGAATCTCAAGGATATTGTCTGAAGTTGAATGGGGAAGCCGAG  
ATATTCTTCAGGAAGAGTAGCATTAAAAACCCTATAATCCACAAGAAGGGAAGCATCCTGGTCA  
ACAGAACATACGAAGCTGAAGAGAAGGACCAGTTTGGCAACATTCAAATCGTTAGGAAGAATA  
TCCCCGAAAACATATATCAAGAAGTGTACAAGTATTTTAATGACAAATCCGACAAGGAATTGTC  
CGACGAAGCGGCTAAGCTCAAAAACGTCGTTGGGCACCACGAGGCTGCTACAAATATTGTCAAA  
GACTATCGCTACACATACGATAAGTATTTTCTCCACATGCCGATTACCATCAATTTCAAGGCTA  
ATAAGACAGGATTCATTAACGACCGAATCCTCCAGTATATAGCCAAGGAAAAGGACCTCCATGT  
GATCGGCATTGACAGGGGCGAACGGAATCTGATCTACGTCAGCGTCATAGATACCTGTGGCAAC  
ATCGTGGAACAGAAGTCTTTTAACATCGTGAATGGGTACGATTATCAGATAAAGCTGAAGCAGC  
AAGAGGGAGCTAGGCAGATAGCACGGAAGGAGTGGAAAGAAATAGGGAAGATTAAAGAGATCA  
AGGAAGGCTACTTGTCCCTTGTGATTTCATGAAATTTCTAAGATGGTGATAAAGTACAACGCAAT  
CATTGCAATGGAGGACCTGAGCTATGGCTTTAAGAAGGGACGGTTTAAAGTCGAGAGGCAGGTG  
TATCAGAAGTTTGAACCATGCTCATCAACAAGCTGAATTACCTGGTATTTAAAGACATCTCCA  
TTACCGAAAACGGGGGACTGCTCAAAGGATATCAGCTTACTTACATCCCCGACAAGCTGAAAAA  
CGTGGGCCACCACTGCGGCTGCATTTTCTATGTGCCTGCAGCCTACACATCTAAAATCGACCCCA  
CTACCGGGTTTCGTGAACATATTCAAATTTAAAGACTTGACTGTTGACGCTAAGCGGGAGTTTCAT  
TAAAAAGTTTGATTCCATCCGCTACGATTCCGAGAAGAATCTGTTTTGCTTCACATTGACTAT  
AACAACCTTCATCACTCAAAAATACGGTGATGTCTAAAAGCAGTTGGAGCGTGTACACATACGGCG  
TGCGCATTAACGCAGGTTTGTCAATGGCCGGTTTAGCAACGAGTCCGATACTATTGACATCAC  
AAAAGATATGAAAAGACTCTGGAGATGACCGATATTAATTGGCGGGATGGACACGATCTGCG  
CCAGGACATTATTGATTACGAAATCGTGCAGCACATTTTGTAGATCTTTCGCTTGACGGTACAA  
ATGCGTAACCTTGTCTGAACTGGAGGACCGTGATTACGATCGTCTCATTTACCTGTACTGA  
ACGAAAATAACATTTTTTATGACAGCGCGAAAGCGGGGGATGCACTTCCTAAGGATGCCGATGC  
AAATGGTGCGTATTGTATTGCATTAAGGGTTATATGAAATTAAACAAATTACCGAAAATTG  
GAAAGAAGATGGTAAATTTTCGCGCGATAAACTCAAAATCAGCAATAAAGATTGGTTCGACTT  
TATCCAGAATAAGCGCTATCTCTAA

### **HsMAD7 3:**

ATGAACAATGGAACAAACAACTTCCAAAATTTTCATAGGAATATCCTCTCTGCAGAAAACATTGC  
GGAATGCTCTCATCCCAACTGAGACAACCCAGCAGTTCATAGTCAAAAACGGGATCATCAAAGA  
AGACGAACTGAGAGGCGAGAACCGCCAGATTTTGAAGGACATAATGGATGATTACTATCGGGG  
GTTTATTTCCGAGACTTTGAGTAGCATCGACGATATCGACTGGACCTCCTTGTTTCGAGAAAATG  
GAGATTGAGCTCAAGAATGGGGACAACAAAGATACCCTCATCAAGGAACAGACCGAATACAGGA

AGGCTATCCATAAAAAGTTTGCTAACGACGATCGCTTTAAGAACATGTTTGTAGTGCCAAACTGAT  
TTCTGATATTCTGCCCCGAGTTTGTATTTCATAATAACAATTACTCTGCCAGTGAAAAAGAAGAG  
AAGACTCAGGTTATTAAGCTGTTTTCTCGGTTCCGCGACTAGTTTCAAAGACTATTTTAAGAATA  
GGGCTAATTGCTTCAGCGCCGATGACATCTCATCCAGCAGCTGCCATAGGATAGTCAACGACAA  
TGCTGAAATTTTCTTCAGCAATGCCTTGGTCTACCGGAGAATCGTCAAGTCCCTGAGTAACGAC  
GACATCAATAAAATCTCAGGCGATATGAAGGACTCATTGAAGGAAATGAGTCTCGAAGAAATC  
TATTCATACGAGAAATACGGCGAGTTTATCACACAGGAGGGGATTTCAATTCTATAATGATATCT  
GTGGCAAAGTTAACTCATTCATGAATCTGTATTGCCAGAAGAACAAGGAGAACAAGAACCTGTA  
TAAATTGCAGAAGCTGCACAAACAGATTCTGTGTATTGCTGATACCTCTTACGAAGTACCATAT  
AAGTTCGAAAGTGATGAAGAGGTCTACCAAAGTGTCACCGGCTTTCTTGACAATATTTCTTCCA  
AGCATATTGTGCGAGAGGCTGCGGAAGATCGGCGACAATTACAACGGGTACAACCTCGACAAGAT  
CTACATTGTTTCTAAATTCTACGAATCAGTCTCCCAAAAGACCTACAGAGACTGGGAAACCATT  
AATACCGCCTTGAGATCCACTACAATAACATTCTCCAGGGAATGGTAAAAGCAAGGCCGACA  
AGGTAAAGAAGGCAGTGAAAAATGATCTTCAGAAATCAATTACGGAAATCAATGAATTGGTGT  
CCAACATAAGCTCTGCAGTGACGACAACATCAAAGCTGAAACCTATATACATGAGATCAGTCA  
CATCCTCAACAATTTTGAAGCTCAGGAGCTGAAGTATAACCCAGAGATTCACCTGGTGGAATCT  
GAACCTAAGGCGTCCGAACCTGAAAAATGTGCTGGATGTGATCATGAACGCCTTCCATTGGTGCA  
GTGTGTTTCATGACTGAGGAGCTGGTGGATAAAGACAATAATTTCTATGCTGAGCTGGAAGAGA  
TCTATGACGAGATCTATCCTGTAATTTCTTTGTACAACCTGGTGCGCAACTACGTTACCCAGAA  
GCCTTACAGCACCAAGAAGATCAAGCTTAACCTCGGCATCCCAACCCTGGCTGATGGGTGGAGC  
AAATCTAAAGAGTACAGTAACAATGCCATTATTCTTATGCGGGACAATCTGTATTACCTCGGTA  
TCTTCAACGCTAAGAATAAAACCCGACAAGAAAATCATCGAGGGGAACACTTCCGAAAACAAGGG  
GACTACAAGAAGATGATCTACAATTTGCTCCCAGGACCTAATAAGATGATACCAAAGGTCTTC  
CTGAGTAGCAAGACCGGCGTGGAGACGTACAAACCCTCTGCCTATATTCTTGAGGGGTACAAAC  
AGAACAAGCACATCAAATCCAGCAAAGACTTTGATATTACATTTTGCCATGACTTGATTGACTA  
CTTTAAAAACTGCATTGCTATCCATCCTGAGTGGAAGAATTTGCGTTTTGACTTCTCTGATACA  
TCCACGTATGAAGACATAAGTGGTTTCTACCGCGAGGTGCAATTGCAGGGCTATAAGATCGACT  
GGACGTATATTTAGAGAAAAGACATCGACCTCCTGCAAGAAAAGGGACAGCTCTACTTGTTC  
AATCTACAATAAAGACTTCTCAAAGAAATCAACCGGAAATGATAACCTCCACACTATGTATCTC  
AAGAACCTCTTCAGCGAGGAAAATCTGAAGGACATTGTCTCTCAAACCTCAACGGTGAAGCTGAAA  
TTTTCTTTTCGCAAAAGCAGCATTAAGAACCCGATCATCCACAAGAAAGGCAGTATCCTCGTCAA  
CCGAACCTATGAGGCGGAGGAAAAAGACCAGTTGCGTAATATACAGATCGTTGCGAAAAACATC  
CCCGAAAATATCTATCAGGAACGTGATAAGTACTTTAATGACAAGTCAGACAAAGAACTCAGTG  
ACGAGGCTGCTAAGCTGAAGAACGTTGTGGGCCACCACGAAGCAGCTACCAACATCGTTAAAGA  
CTACAGGTACACCTACGATAAGTATTTCTTCATATGCCAATCACAATAAACTTTAAGGCTAAC  
AAGACCGGCTTCATTAACGATCGCATCCTCCAATACATCGCCAAGGAGAAAGACCTGCACGTAA  
TCGGTATTGACAGGGGAGAACGAAACCTCATTTATGTGTCTGTCTATTGACACTTGCGGAAATAT  
CGTCGAACAGAAATCCTTCAATATTGTCAACGGCTACGACTATCAGATCAAGCTCAAACAACAG  
GAAGGGGCAAGACAGATCGCTAGAAAAGAGTGGAAGAGATTGGAAAAATCAAAGAGATTAAG  
GAGGGGTACCTGTCTCTCGTTATACACGAAATCAGCAAAATGGTCATAAAATACAACGCAATTA  
TAGCCATGGAAGACCTTAGTTATGGTTTCAAAAAGGGTCGGTTTAAGGTTGAAAGGCAGGTAT  
ATCAAAAGTTCGAGACTATGCTGATAAATAAGCTCAACTATTTGGTTTTCAAAGATATCAGTAT  
CACCGAAAATGGCGGATTGTTGAAAGGGTATCAGTTGACATACATCCCCGATAAGCTCAAGAAC  
GTGGGGCACCAGTGCGGCTGTATCTTCTACGTGCCTGCAGCATATACCAGTAAAATTGATCCAA  
CGACCGGTTTTCTGTAACATCTTCAAGTTCAAAGATCTTACCGTGGACGCTAAGCGGGAATTTAT  
CAAAAAGTTCGATTCCATACGATACGACTCCGAGAAAAATTTGTTCTGTTTTACCTTCGATTAT  
AACAACCTTTATTACCCAGAACACCGTGATGAGCAAATCCTCATGGTCCGTGTACACTTATGGCG  
TCCGCATCAAACGACGCTTCGTGAATGGGCGCTTCAGTAATGAAAGCGACACCATTGACATTAC  
CAAAGATATGGAAGAACTCTGGAATGACCGACATTAACCTGGCGAGATGGGCATGATTTGCG  
ACAAGATATCATCGACTATGAGATAGTACAGCATATTTTCGAGATTTTCAGACTCACCGTCCAA  
ATGCGTAACTCCTTGTCTGAACTGGAGGACCGTGATTACGATCGTCTCATTTACCTGTACTGA  
ACGAAAATAACATTTTTTTATGACAGCGGAAAGCGGGGGATGCACTTCCTAAGGATGCCGATGC

AAATGGTGCGTATTGTATTGCATTAAGGGTTATATGAAATTAAACAAATTACCGAAAATTG  
GAAAGAAGATGGTAAATTTTCGCGCGATAAACTCAAAATCAGCAATAAAGATTGGTTCGACTT  
TATCCAGAATAAGCGCTATCTCTAA

#### **HsMAD7 4:**

ATGAACAACGGGCTAACAATTTTCAGAACTTTATCGGAATATCCTCCCTGCAGAAAACCTTA  
GAAATGCTTTGATCCCCACAGAAACCACCCAGCAGTTCATAGTGAAGAACGGGATCATAAAGGA  
GGATGAGCTGAGAGGAGAAAACCGGCAGATACTCAAGGACATCATGGATGATTACTACAGAGG  
CTTCATTTCTGAGACCCTGAGCAGTATAGATGATATTGACTGGACATCCCTTTTTGAAAAGATG  
GAGATCCAGTTGAAAAATGGCGATAACAAGGACACCCTCATAAAGGAGCAGACAGAGTACCGA  
AAAGCCATCCACAAAAAGTTCGCTAACGACGACCGGTTTAAAAACATGTTCTCTGCTAAGCTTA  
TCTCTGATATCCTCCCCGAGTTTGTTCATCCACAACAATTATAGCGCTAGTGAAGAGGAGGA  
GAAGACACAGGTTATCAAGCTGTTTCAGTAGATTTGCAACATCTTTCAAAGACTACTTCAAAAT  
CGGGCCAAGTCTTTTCAGCTGATGACATCAGTAGCAGTAGTTGTTCATCGCATTTGTGAATGATA  
ACGCCGAGATATTTTTCAGTAATGCTCTGGTTTATCGGAGGATTGTCAAGAGCCTGTCTAACGA  
TGATATCAATAAAATCTCAGGCGATATGAAGGACTCTCTCAAAGAGATGAGTCTGGAAGAGAT  
CTACTCTTATGAAAAGTACGGAGAGTTTATCACACAGGAGGGTATCTCTTTCTATAATGACATA  
TGCGGGAAAGTGAACCTCATTCATGAATCTGTACTGCCAGAAGAACAAGGAGAACAAAAATCTTT  
ACAACTTCAGAAATTGCATAAGCAGATCTTGTGCATTGCTGACACGTCATATGAGGTTCCCTTA  
CAAGTTCGAGTCCGACGAAGAAGTGTACCAGTCTGTCAACGGCTTTTTGGACAACATAAGTAGT  
AAGCATATAGTGAACGGCTGAGGAAAATAGGCGATAACTACAACGGATATAATCTGGATAAA  
ATCTACATCGTCAGCAAGTTCTACGAGTCCGCTCTCTCAGAAAACCTACCGGGACTGGGAACTA  
TCAATACCGCTCTTGAAATCCATTACAACAACATTTCTTCCAGGTAACGGCAAGTCCAAGGCCGA  
CAAGGTGAAGAAGGCTGTCAAAAACGATTTGCAGAAGTCAATCACCGAAATTAATGAACTGGT  
AAGTAATTACAAGCTCTGTTTCAGATGACAATATCAAGGCTGAAACGTACATCCACGAGATCAGC  
CACATCTTGAATAACTTCGAGGCTCAGGAAGTGAAGTATAATCCAGAAATTCATCTGGTCAAT  
CAGAGTTGAAGGCTCTGAGCTGAAAAATGTGCTGGATGTAATCATGAACGCTTTCCATTGGTG  
CTCCGTCTTTATGACCGAGGAGCTGGTGGATAAAGATAACAATTTCTACGCCGAGTTGGAAGAA  
ATTTACGATGAGATTTATCCCGTTATCTCACTTTACAACCTTGTGCGGAATTATGTGACACAGA  
AGCCTTATAGCACAAAGAAAATCAAGCTGAACCTTCGGGATCCCAACCCTGGCTGACGGCTGGAG  
CAAGAGTAAGGAATACTCTAATAACGCAATCATCTTGATGCGCGATAACCTCTACTATCTTGGA  
ATCTTTAATGCGAAAAACAAACCAGACAAGAAGATCATCGAAGGAAACACATCAGAGAATAAG  
GGAGATTATAAGAAAATGATCTATAATCTGCTGCCTGGTCCGAATAAAATGATCCCCAAGGTGT  
TCCTCTCTTCCAAAACCGGTGTAGAAACATACAAACCTTCAGCCTACATCCTCGAGGGCTACAA  
ACAGAATAAACACATCAAGAGTTCAAAGGACTTCGATATTACGTTTTGCCATGATCTGATTGAC  
TACTTCAAGAATTGTATCGCTATTTCATCCAGAATGGAAGAATTTTGGGTTCGACTTTAGTGACA  
CAAGCACATACGAAGATATTTCCGGCTTCTATCGCGAAGTGGAAGTCCAGGGATATAAGATCGA  
TTGGACCTACATTAGTGAGAAGGACATCGACCTGCTGCAGGAGAAAGGGCAGTTGTACCTGTTT  
CAGATTTACAATAAAGATTTCTCTAAGAAAAGCACCGGGAATGATAACCTGCACACAATGTATC  
TGAAGAAGTGTCTCCGAAGAAAACCTGAAAGATATAGTTCTCAAGCTTAATGGAGAAGCCGA  
GATATTTTTCAGAAAGAGCAGCATCAAGAACCCCATCATCCATAAAAAGGGTAGTATTCTCGTA  
AATAGAACCTACGAAGCTGAGGAAAAGGATCAATTCGGAAATATCCAAATCGTTAGGAAAAAT  
ATCCCGGAGAACATCTACCAGGAGTTGTACAAGTATTTCAACGATAAATCTGATAAGGAGCTGT  
CCGATGAAGCTGCCAAGCTCAAGAACGTAGTGGGACACCACGAGGCCGCCACCAACATAGTGAA  
GGACTACAGGTACACTTATGACAAATACTTTCTGCATATGCCTATAACAATTAACCTCAAAGCC  
AATAAGACCGGCTTCATAAATGATCGCATTTCTGCAATATATCGCTAAGGAGAAAGACCTGCACG  
TGATCGGGATCGACCGCGGGAGCGGAATCTCATTTATGTGTCCGTAATAGATACCTGCGGAAA  
TATCGTCGAGCAGAAATCATTCACATCGTGAATGGTTACGACTACCAGATCAAACCTTAAACAG  
CAGGAGGGGTGCCAGACAGATCGCGAGAAAAGAGTGGAAGAAATTTGAAAAGATTAAAGAGATT  
AAGGAGGGGTACCTGAGCCTGGTTATTCATGAGATTTCAAAGATGGTGATCAAGTATAACGCCA  
TCATCGCAATGGAGGACCTTTCCTACGGGTTTAAAAAGGGGCGGTTCAAAGTGGAACGGCAAGT

TTACCAGAAGTTTGAAACTATGTTGATTAACAAGCTCAACTACTTGGTGTTTAAGGATATTTCT  
 ATCACAGAGAACGGGGCCTTTTGAAAGGTTACCAGTTGACATATATTCAGACAAGCTGAAGA  
 ACGTGGGCCACCAGTGTGGGTGCATCTTCTATGTGCCAGCTGCCTACACTTCTAAGATTGACCC  
 ACAACCGGCTTTGTGAACATCTTTAAGTTTAAAGATCTTACCGTTGACGCCAAGCGCGAATTCA  
 TCAAAAAGTTCGACTCTATCAGGTATGATTCCGAGAAGAACCTGTTTTGCTTCACTTTCGATTA  
 CAACAATTTTCATTACCCAGAACACAGTCATGTCTAAAAGCTCTTGGAGTGTGTACACCTACGGG  
 GTTCGCATAAAACGCAGGTTTGTGAACGGACGCTTTTCTAATGAATCCGATACAATCGACATTA  
 CGAAGGACATGGAGAAAACCCCTTGAGATGACAGACATCAACTGGCGGGACGGGCATGATCTTAG  
 ACAGGATATCATCGACTATGAGATTGTGCAGCACATCTTTGAGATTTTCAGACTGACCGTGCAA  
 ATGCGTAACTCCTTGTCTGAACTGGAGGACCGTGATTACGATCGTCTCATTTACCTGTACTGA  
 ACGAAAATAACATTTTTTTATGACAGCGCGAAAGCGGGGGATGCACTTCCTAAGGATGCCGATGC  
 AAATGGTGCGTATTGTATTGCATTAAGGGTTATATGAAATTAAACAAATTACCGAAAATTG  
 GAAAGAAGATGGTAAATTTTCGCGCGATAAACTCAAAATCAGCAATAAAGATTGGTTCGACTT  
 TATCCAGAATAAGCGCTATCTCTAA

#### S6: Primers/ssDNA Oligonucleotides

| Name                          | Sequence 5' - 3'                                                 |
|-------------------------------|------------------------------------------------------------------|
| Primer 1                      | CGTTTCGGAATTCTGTTGTAGTT                                          |
| Primer 2                      | CTCGAGACGGGAAGTCTTTAC                                            |
| <i>OCH1</i> fwd               | ATGGCGAAGGCAGATGGC                                               |
| <i>OCH1</i> rev               | TTAGTCCTTCCAACCTCCTTCAAATG                                       |
| <i>PMT2</i> fwd               | ATGACAGGCCGTGTCGACC                                              |
| <i>PMT2</i> rev               | CTATGGGTCTGATACTCTCCAACCTAGGTAG                                  |
| <i>PMT2</i> sequencing primer | GATTCAATGCTGCTGCTATTTCACTG                                       |
| <i>TP11</i> fwd               | ATGGTACGTGCATTGAGTCTCATAAG                                       |
| <i>TP11</i> rev               | CTAGTTTCTGGAATTAATAATGTCCACGAATTC                                |
| <i>RFP</i> fwd                | ATGGTTTCTAAGGGTGAGGAAGTTATC                                      |
| <i>RFP</i> rev                | TTACTTATAAAGCTCGTCCATACCGTAC                                     |
| <i>GUT1</i> fwd               | ATGGGAAAAGACTATACACCACTAG                                        |
| <i>GUT1</i> rev               | TTAAGCAGTGTCTTAAGCCAG                                            |
| Sh blefwd                     | ATGGCTAAACTCACCTCTGCTGTTC                                        |
| Sh blerev                     | TTAGTCCTGCTCTTCTGCGACGAAATG                                      |
| gRNA <i>GUT1</i>              | GTCGGAATTTCTACTCTTGTAGATCAACGGTATTGTGTGGAACGAGG<br>CCGGCATGGTCCC |
| gRNA TTTA 1                   | GTCGGAATTTCTACTCTTGTAGATGTCACCATGGAGAACAAGAACGG<br>CCGGCATGGTCCC |
| gRNA TTTA 2                   | GTCGGAATTTCTACTCTTGTAGATCCACTTGACTAACGAAAAATCGG<br>CCGGCATGGTCCC |
| gRNA TTTG 1                   | GTCGGAATTTCTACTCTTGTAGATGTCCAAGAAGACAGGAAAGCCGG<br>CCGGCATGGTCCC |

|                     |                                                                  |
|---------------------|------------------------------------------------------------------|
| gRNA TTTG 2         | GTCGGAATTTCTACTCTTGTAGATGTACTATTGACTCTTGGTTGAGG<br>CCGGCATGGTCCC |
| gRNA TTTC 1         | GTCGGAATTTCTACTCTTGTAGATCTCAGCCAGGCTGGGTGAATGG<br>CCGGCATGGTCCC  |
| gRNA TTTC 2         | GTCGGAATTTCTACTCTTGTAGATTGCAACCAAGTTCAGATGGTTGG<br>CCGGCATGGTCCC |
| gRNA TTTT 1         | GTCGGAATTTCTACTCTTGTAGATGACTACCACGGTCAGGAAGTGGG<br>CCGGCATGGTCCC |
| gRNA TTTT 2         | GTCGGAATTTCTACTCTTGTAGATGAAATTCTGGGACGTCGATACGG<br>CCGGCATGGTCCC |
| gRNA CTTA 1         | GTCGGAATTTCTACTCTTGTAGATCCTTACTGATGACGCCCTTGCGGC<br>CGGCATGGTCCC |
| gRNA CTTA 2         | GTCGGAATTTCTACTCTTGTAGATCTGATGACGCCCTTGCTCTTCGGC<br>CGGCATGGTCCC |
| gRNA CTTG 1         | GTCGGAATTTCTACTCTTGTAGATGAAGTTGAGTCCGTTGACAATGG<br>CCGGCATGGTCCC |
| gRNA CTTG 2         | GTCGGAATTTCTACTCTTGTAGATTGTGGTTGTCCAATCTCCACCGGC<br>CGGCATGGTCCC |
| gRNA CTTC 1         | GTCGGAATTTCTACTCTTGTAGATCGAAGGTATTTCCCTGACAGTGG<br>CCGGCATGGTCCC |
| gRNA CTTC 2         | GTCGGAATTTCTACTCTTGTAGATCAGAAATCAGATCTTCCGCAGGG<br>CCGGCATGGTCCC |
| gRNA CTTT 1         | GTCGGAATTTCTACTCTTGTAGATACAACGGTATTGTGTGGAACGGG<br>CCGGCATGGTCCC |
| gRNA CTTT 2         | GTCGGAATTTCTACTCTTGTAGATGGCTGGATGTCTGGGTGACCAGG<br>CCGGCATGGTCCC |
| gRNA <i>RFP</i> 1   | GTCGGAATTTCTACTCTTGTAGATAGTACCCTCATATGGTCTTCCGGC<br>CGGCATGGTCCC |
| gRNA <i>RFP</i> 2   | GTCGGAATTTCTACTCTTGTAGATAAGTGGGAAAGAGTCATGAACGG<br>CCGGCATGGTCCC |
| gRNA <i>Sh ble1</i> | GTCGGAATTTCTACTCTTGTAGATTCCCGTGACTTCGTAGAGGACGG<br>CCGGCATGGTCCC |
| gRNA <i>Sh ble2</i> | GTCGGAATTTCTACTCTTGTAGATCCGGTGTGTACGTGACGACGGG<br>CCGGCATGGTCCC  |
| gRNA <i>TPI1</i> 1  | GTCGGAATTTCTACTCTTGTAGATAAGTTTCCTCCTACGAAAAATGG<br>CCGGCATGGTCCC |
| gRNA <i>TPI1</i> 2  | GTCGGAATTTCTACTCTTGTAGATCGTAGGAGGAACTTCAAATGG<br>CCGGCATGGTCCC   |
| gRNA <i>TPI1</i> 3  | GTCGGAATTTCTACTCTTGTAGATTGCGGAGACGTAAACAGTCTTGG<br>CCGGCATGGTCCC |
| gRNA <i>TPI</i> 4   | GTCGGAATTTCTACTCTTGTAGATAAGGACTTGGGTGTCCCTTACGG<br>CCGGCATGGTCCC |
| gRNA <i>OCH1</i> 1  | GTCGGAATTTCTACTCTTGTAGATTACGGACCCTCACAACAATTAGG<br>CCGGCATGGTCCC |
| gRNA <i>OCH1</i> 2  | GTCGGAATTTCTACTCTTGTAGATATTTTCCTTACCGCAGTTACGGGC<br>CGGCATGGTCCC |
| gRNA <i>OCH1</i> 3  | GTCGGAATTTCTACTCTTGTAGATTGATACCCGATGATGCAGCATGG<br>CCGGCATGGTCCC |
| gRNA <i>PMT2</i> 1  | GTCGGAATTTCTACTCTTGTAGATAGGAAGAACCAGTCACTTCGAGG<br>CCGGCATGGTCCC |



|                    |                                                                   |
|--------------------|-------------------------------------------------------------------|
| gRNA <i>PMT2</i> 2 | GTCGGAATTTCTACTCTTGTAGATGCTCCTACTATCTCAGACACGGGC<br>CGGCATGGTCCC  |
| gRNA <i>PMT2</i> 3 | GTCGGAATTTCTACTCTTGTAGATATATCAAGACAACCTGGCTATGG<br>CCGGCATGGTCCC  |
| gRNA <i>PMT2</i> 4 | GTCGGAATTTCTACTCTTGTAGATAGCCATTTCCACCATTTGCGAGGC<br>CGGCATGGTCCC  |
| gRNA <i>PMT2</i> 5 | GTCGGAATTTCTACTCTTGTAGATTTCGTAAGAAATATGCTGCTCAGG<br>CCGGCATGGTCCC |
| gRNA <i>PMT2</i> 6 | GTCGGAATTTCTACTCTTGTAGATGGATCTGGTCTGTTACATTCCGG<br>CCGGCATGGTCCC  |

#### S7: gRNAs

| Name                    | Sequence 5' - 3'      |
|-------------------------|-----------------------|
| <i>GUT1</i>             | CAACGGTATTGTGTGGAACGA |
| TTTA 1                  | GTCACCATGGAGAACAAGAAC |
| TTTA 2                  | CCACTTGACTAACGAAAAATC |
| TTTT 1                  | GACTACCACGGTCAGGAAGTG |
| TTTT 2                  | GAAATTCTGGGACGTCGATAC |
| TTTC 1                  | CTCAGCCAGGCTGGGTGAAT  |
| TTTC 2                  | TGCAACCAAGTTCAGATGGTT |
| TTTG 1                  | GTCCAAGAAGACAGGAAAGCC |
| TTTG 2                  | GTACTATTGACTCTTGGTTGA |
| CTTA 1                  | CCTTACTGATGACGCCCTTGC |
| CTTA 2                  | CTGATGACGCCCTTGCTCTTC |
| CTTT 1                  | ACAACGGTATTGTGTGGAACG |
| CTTT 2                  | GGCTGGATGTCTGGGTGACCA |
| CTTC 1                  | CGAAGGTATTTCCCTGACAGT |
| CTTC 2                  | CAGAAATCAGATCTTCCGCAG |
| CTTG 1                  | GAAGTTGAGTCCGTTGACAAT |
| CTTG 2                  | TGTGGTTGTCCAATCTCCACC |
| <i>RFP</i> 1            | AGTACCCTCATATGGTCTTCC |
| <i>RFP</i> 2            | AAGTGGGAAAGAGTCATGAAC |
| Sh ble 1                | TCCCGTGACTTCGTAGAGGAC |
| Sh ble <sup>BLE</sup> 2 | CCGGTGTGTACGTGACGACG  |
| <i>TPI1</i> 1           | AAGTTTCCTCCTACGAAAAAT |
| <i>TPI1</i> 2           | CGTAGGAGGAACTTCAAAAT  |

|               |                       |
|---------------|-----------------------|
| <i>TPI1 3</i> | TGCGGAGACGTAAACAGTCTT |
| <i>TPI1 4</i> | AAGGACTTGGGTGTCCCTTAC |
| <i>OCH1 1</i> | TACGGACCCTCACAACAATTA |
| <i>OCH1 2</i> | ATTTTCCTTACCGCAGTTACG |
| <i>OCH1 3</i> | TGATACCCGATGATGCAGCAT |
| <i>PMT2 1</i> | AGGAAGAACCAGTCACTTCGA |
| <i>PMT2 2</i> | GCTCCTACTATCTCAGACACG |
| <i>PMT2 3</i> | ATATCAAGACAACTTGGCTAT |
| <i>PMT2 4</i> | AGCCATTTCCACCATTTGCGA |
| <i>PMT2 5</i> | TCGTAAGAAATATGCTGCTCA |
| <i>PMT2 6</i> | GGATCTGGTCTGTTACATTCC |
